# Supplementary material for: Theoretical studies on the monomeric vanadium oxides supported by ceria: the atomic structures and oxidative dehydrogenation activities
Source: Royal Society of Chemistry journal article supplement (doi:10.1039/c5ra08962j), 2015-01-01
Supplement: c5ra08962j1.pdf [file c5ra08962j1.pdf]

## Supporting Information

### **Theoretical studies on the monomeric vanadium oxides supported at ceria: the atomic structures and oxidative dehydrogenation activities**

*Xin-Ping Wu,<sup>1</sup> Juanjuan Liu,<sup>2</sup> Jie Fan,<sup>2</sup> and Xue-Qing Gong<sup>\*,1</sup>*

<sup>1</sup>Key Laboratory for Advanced Materials, Centre for Computational Chemistry and Research Institute of Industrial Catalysis, East China University of Science and Technology, Shanghai 200237, People's Republic of China;

<sup>2</sup>Key Lab of Applied Chemistry of Zhejiang Province, Department of Chemistry, Zhejiang University, Hangzhou 310027, People's Republic of China

\*E-mail address: xgong@ecust.edu.cn (X.-Q. G.)

### Computational details

We used the PBE functional with a Hubbard  $U$  of 5.0 eV<sup>1</sup> for the Ce 4*f* orbital and dispersion corrections by DFT-D2 scheme of Grimme<sup>2</sup> (PBE+U+D) to do the spin-polarized density functional theory (DFT) calculations as implemented in the Vienna ab initio Simulation Package (VASP)<sup>3</sup>. The required dispersion parameters  $C_6$  and  $R_0$  for O, V, C, H and Ce were taken from refs 2 and 4. The project-augmented wave method (PAW)<sup>5</sup> at a kinetic energy cutoff of 400 eV was used to describe the electron-core interaction. The Ce (5s, 5p, 6s, 5d, 4f), O (2s, 2p), V (3p, 3d, 4s), C (2s, 2p), and H (1s) electrons were treated as valence states. The calculated lattice parameter of bulk ceria using PBE+U+D is 5.440 Å.

The CeO<sub>2</sub>(111) support was modeled by a 9-atomic-layer slab which extended at a (4×4) surface unit cell. A large vacuum gap (>10 Å) was used to avoid the slab-slab interaction. The bottom three layers were fixed at all calculations to estimate bulk properties. In consideration of the big surface cell used, a (1×1×1) k-mesh was used for the Brillouin-zone integration. For all calculations, we used a force stopping-criterion of 0.02 eV/Å on each relaxed ion. Transition states were searched by using the climbing-image nudged elastic band (CI-NEB) method<sup>6</sup>.

Some selected results were also calculated by using the Hyied-Scuseria-Ernzerhof (HSE) hybrid functional<sup>7</sup> (screening length: 0.2).

H-adsorption energies ( $E_{ad}[H]$ ), methanol adsorption energies ( $E_{ad}[MeOH]$ ) and O-vacancy formation energies ( $E_{ov}$ ) were calculated as follows:

$$\begin{aligned} E_{ad}[H] &= E[VO_x/CeO_2] + \frac{1}{2}E[H_2] - E[H/VO_x/CeO_2], \\ E_{ad}[MeOH] &= E[VO_x/CeO_2] + E[MeOH] - E[MeOH/VO_x/CeO_2], \\ E_{ov} &= E[VO_{x-1}/CeO_2] + \frac{1}{2}E[O_2] - E[VO_x/CeO_2], \end{aligned}$$

where  $E[VO_x/CeO_2]$ ,  $E[H/VO_x/CeO_2]$ ,  $E[MeOH/VO_x/CeO_2]$ ,  $E[VO_{x-1}/CeO_2]$ ,  $E[H_2]$ ,  $E[MeOH]$  and  $E[O_2]$  are the DFT total energies of CeO<sub>2</sub>(111) supported VO<sub>x</sub> (VO<sub>x</sub>/CeO<sub>2</sub>(111)), VO<sub>x</sub>/CeO<sub>2</sub>(111) with adsorbed H, VO<sub>x</sub>/CeO<sub>2</sub>(111) with adsorbed methanol, defective VO<sub>x</sub>/CeO<sub>2</sub>(111), gas-phase H<sub>2</sub>, methanol and O<sub>2</sub>, respectively.

Thermodynamic analyses of various VO<sub>x</sub> species were performed by using the formalism described in detail in our earlier study<sup>8</sup>, which is also similar with several other studies<sup>9</sup> as well. Briefly, we used the following thermodynamic formalism to calculate the surface free energy change per unit area ( $\Delta\gamma$ ) at given oxygen partial pressure ( $p$ ) and temperature ( $T$ ):

$$\Delta\gamma(p, T) =$$

$$\frac{1}{A} \left\{ E[VO_x/CeO_2] - E[CeO_2] - E_{bulk}[V] - \frac{x}{2}E[O_2] - \frac{x}{2} \left\{ H[O_2](p^0, T) - H[O_2](p^0, 0K) - TS[O_2](p^0, T) + K_B T \ln \frac{p}{p^0} \right\} \right\} \quad (\text{note: the vibration contributions and the } pV \text{ term of solid components were neglected})$$

where  $A$  is the area of the surface cell.  $E[CeO_2]$  and  $E_{bulk}[V]$  are the DFT total energies of clean CeO<sub>2</sub>(111) and metallic bcc bulk vanadium, respectively.  $K_B$  is the Boltzmann constant.

$p^0$  is the reference state of pressure that equals to 1 atm. Enthalpy ( $H$ ) and entropy ( $S$ ) at temperature  $T$  were calculated according to the formulas on the Web site of NIST<sup>10</sup>.

**Table S1** Calculated energies (eV) of various VO<sub>x</sub> species. All energies are relative to the most stable species of a given composition. The corresponding structures are shown in Figure S2.

|                       | most stable | second most stable |
|-----------------------|-------------|--------------------|
| VO <sub>2</sub> -type | 0           | 1.02               |
| VO <sub>3</sub> -type | 0           | 0.11               |
| VO <sub>4</sub> -type | 0           | 2.56               |

**Table S2** Calculated H adsorption energies ( $E_{ad}[H]$ ) at different O sites, H diffusion barriers ( $E_b$ ), and O-vacancy formation energies ( $E_{ov}$ ) of VO<sub>2</sub>-A. Energies are in eV.

|             |                                                                                    |      |
|-------------|------------------------------------------------------------------------------------|------|
| Structure   | 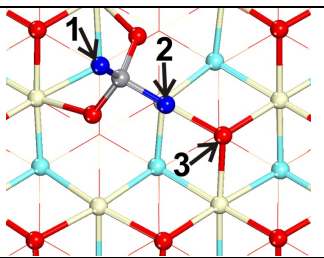 |      |
| $E_{ad}[H]$ | O-1                                                                                | 1.52 |
|             | O-2                                                                                | 1.45 |
|             | O-3                                                                                | 1.51 |
| $E_b$       | O-1→O-2                                                                            | 1.73 |
|             | O-2→O-1                                                                            | 1.65 |
|             | O-2→O-3                                                                            | 0.24 |
|             | O-3→O-2                                                                            | 0.31 |
| $E_{ov}$    |                                                                                    | 0.79 |

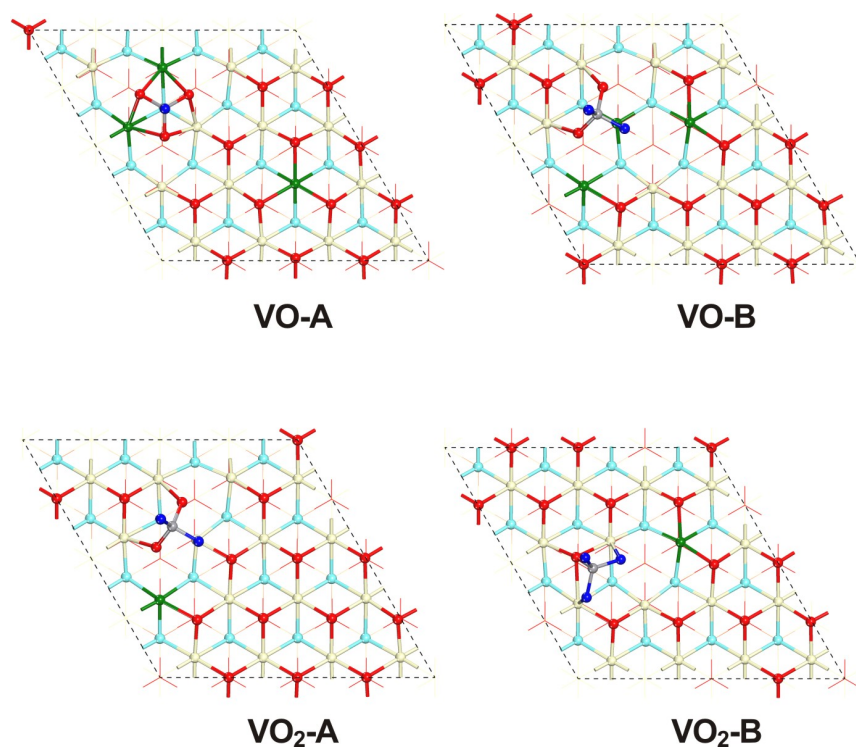

**Fig. S1**  $\text{Ce}^{3+}$  distributions of VO-A, VO-B, VO<sub>2</sub>-A and VO<sub>2</sub>-B (top view).  $\text{Ce}^{3+}$  are in green.

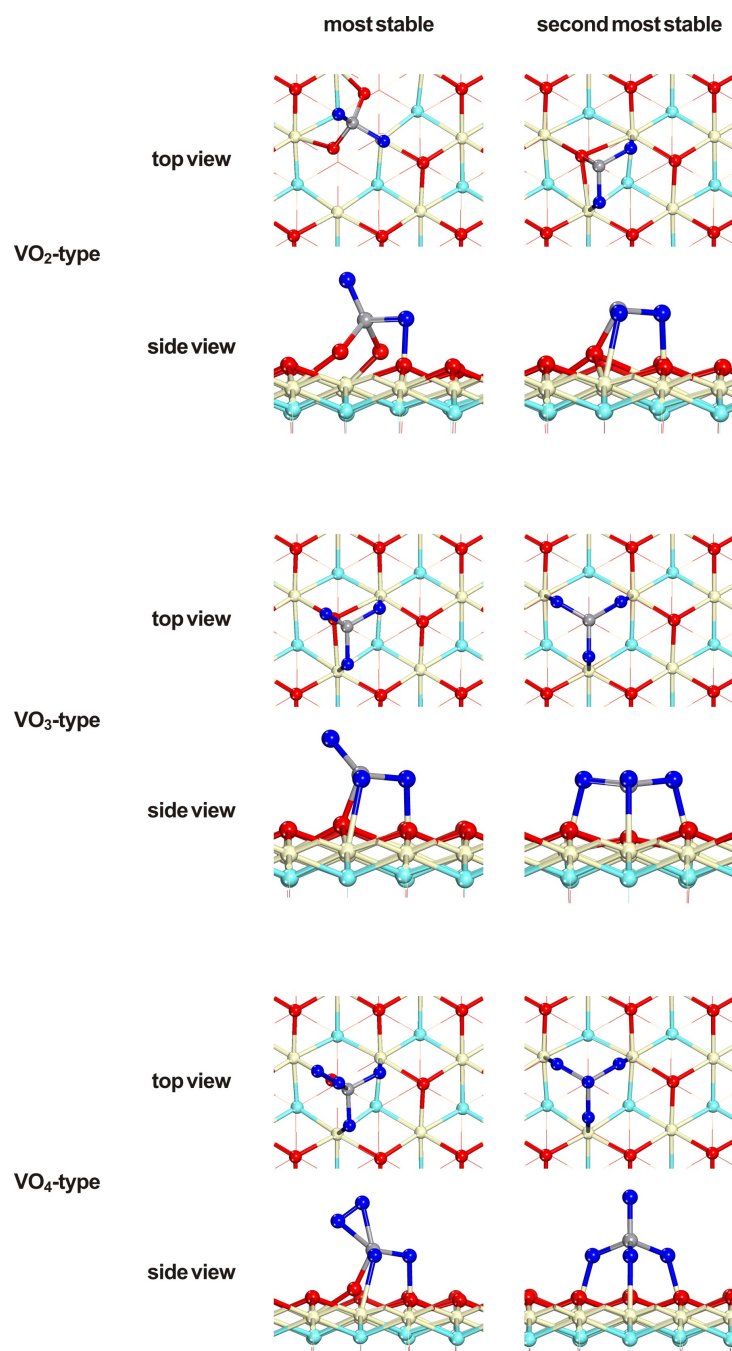

**Fig. S2** Calculated structures of the most stable and the second most stable VO<sub>x</sub> (x=2-4) species.

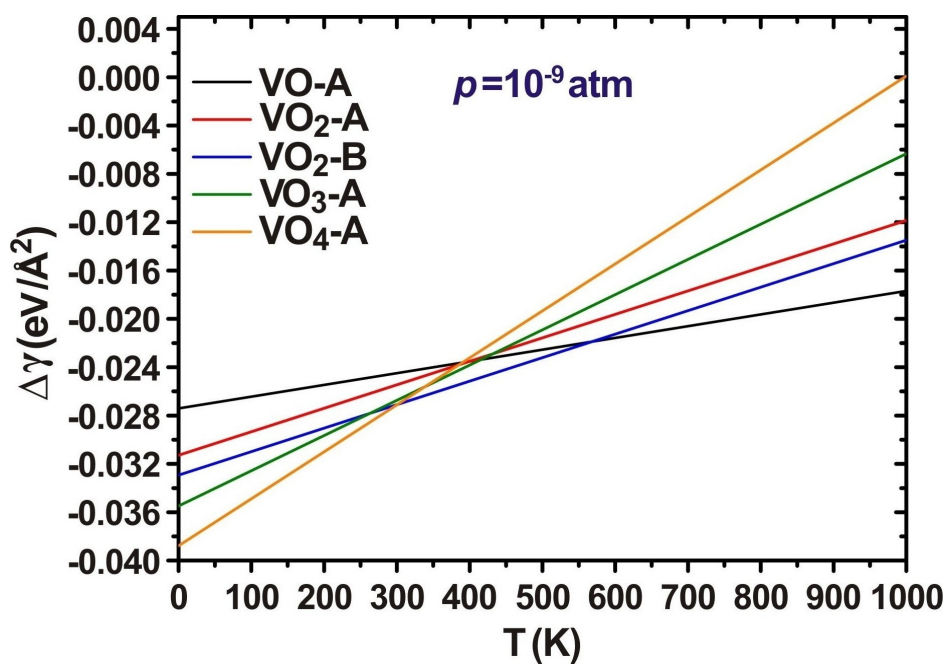

**Fig. S3** Calculated diagram of surface free energy changes ( $\Delta\gamma$ ) for the formation of various  $\text{VO}_x$  species as a function of  $T$  under  $p=10^{-9}$  atm.

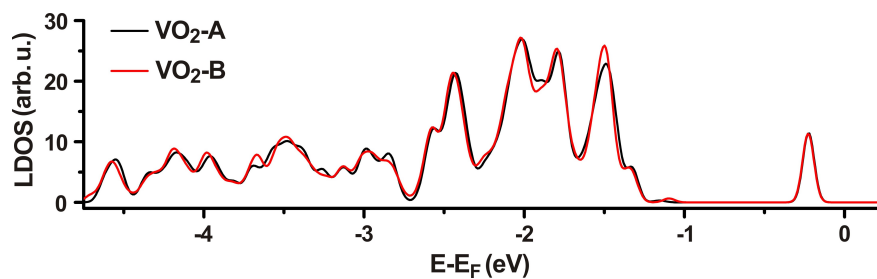

**Fig. S4** Calculated LDOS of the surface O and Ce atoms of VO<sub>2</sub>-A (black) and VO<sub>2</sub>-B (red).

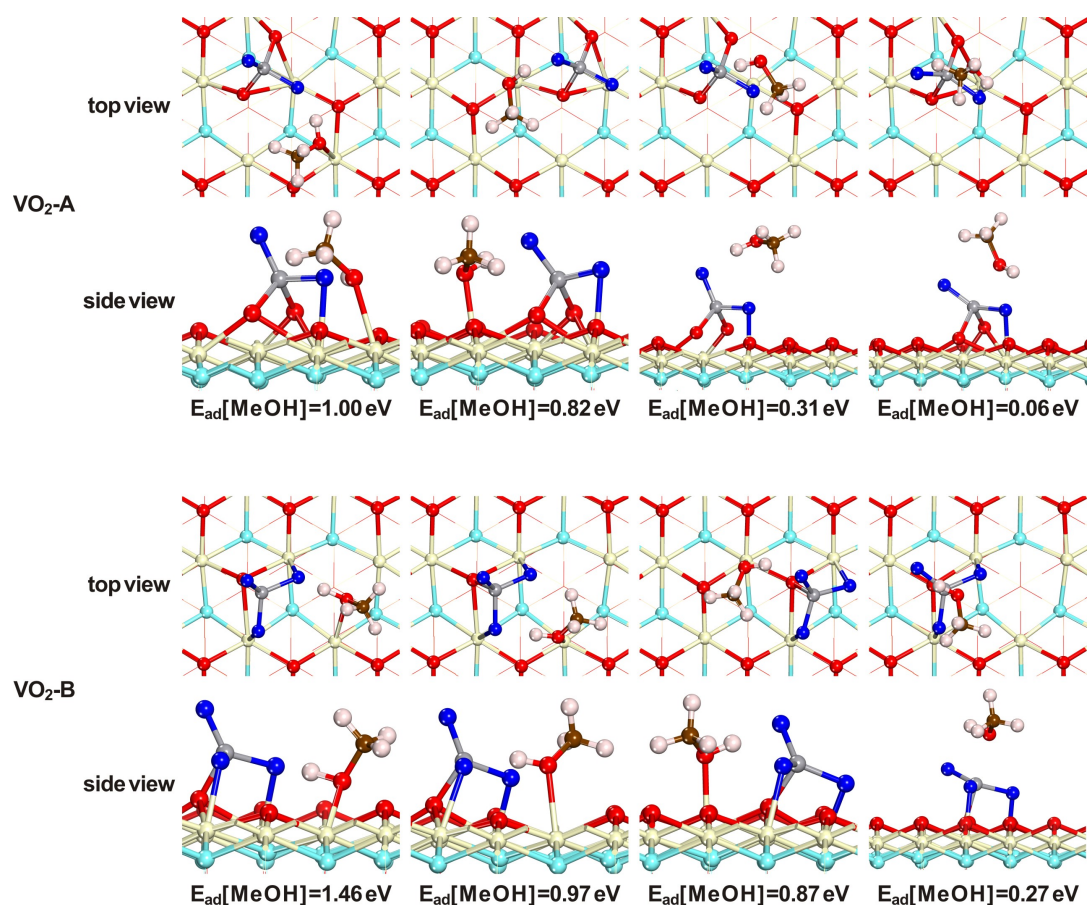

**Fig. S5** Calculated structures of methanol adsorbed at VO<sub>2</sub>-A and VO<sub>2</sub>-B (top and side views) with corresponding adsorption energies.



## References

- 1 M. Nolan, S. C. Parker and G. W. Watson, *Surf. Sci.*, 2005, **595**, 223; M. Nolan, S. Grigoleit, D. C. Sayle, S. C. Parker and G. W. Watson, *Surf. Sci.*, 2005, **576**, 217.
- 2 S. Grimme, *J. Comput. Chem.*, 2006, **27**, 1787.
- 3 G. Kresse and J. Furthmüller, *Comput. Mater. Sci.*, 1996, **6**, 15; G. Kresse and J. Hafner, *Phys. Rev. B: Condens. Matter Mater. Phys.*, 1994, **49**, 14251.
- 4 C. Penschke, J. Paier and J. Sauer, *J. Phys. Chem. C*, 2013, **117**, 5274.
- 5 P. E. Blöchl, *Phys. Rev. B: Condens. Matter Mater. Phys.*, 1994, **50**, 17953.
- 6 G. Mills and H. Jónsson, *Phys. Rev. Lett.*, 1994, **72**, 1124; G. Mills, H. Jónsson and G. K. Schenter, *Surf. Sci.*, 1995, **324**, 305; G. Henkelman and H. Jónsson, *J. Chem. Phys.*, 2000, **113**, 9978; G. Henkelman, B. P. Uberuaga and H. Jónsson, *J. Chem. Phys.*, 2000, **113**, 9901.
- 7 J. Heyd, G. E. Scuseria and M. Ernzerhof, *J. Chem. Phys.*, 2003, **118**(18), 8207.
- 8 J. Liu, X.-P. Wu, S. Zou, Y. Dai, L. Xiao, X.-Q. Gong and J. Fan, *J. Phys. Chem. C*, 2014, **118**, 24950.
- 9 C. Popa, M. V. Ganduglia-Pirovano and J. Sauer, *J. Phys. Chem. C*, 2011, **115**, 7399; K. Reuter and M. Scheffler, *Phys. Rev. B*, 2001, **65**, 035406.
- 10 <http://webbook.nist.gov/>
